# Supplementary material for: Conservation of the links between gene transcription and chromosomal organization in the highly reduced genome of Buchnera aphidicola
Source: PubMed Central journal article supplement (PMC1899503; doi:10.1186/1471-2164-8-143), 2007-06-04
Supplement: 1471-2164-8-143-S2.pdf [file 1471-2164-8-143-S2.pdf]

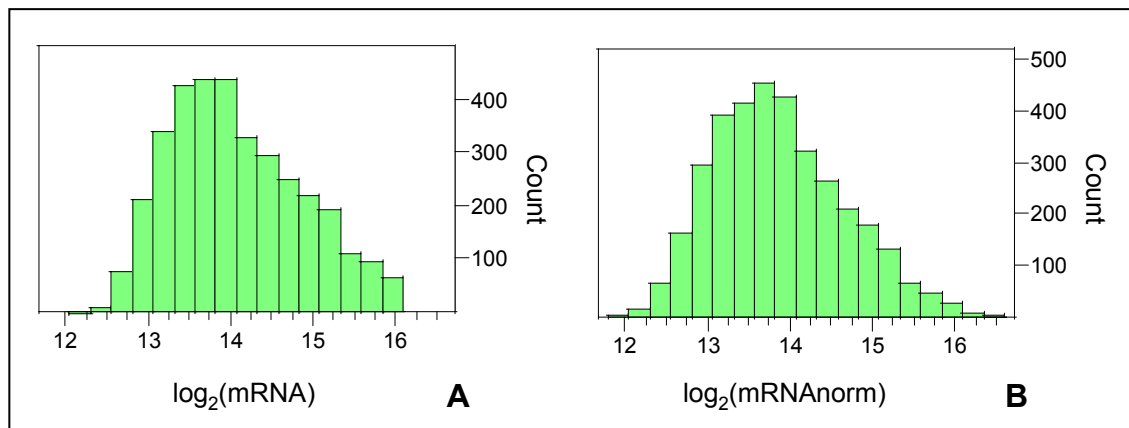

**Supplemental Figure 2 - Distribution of  $\log_2$  mRNA abundances (A) before and (B) after gDNA normalization.**
