# Supplementary material for: Conservation of the links between gene transcription and chromosomal organization in the highly reduced genome of Buchnera aphidicola
Source: PubMed Central journal article supplement (PMC1899503; doi:10.1186/1471-2164-8-143), 2007-06-04
Supplement: 1471-2164-8-143-S3.pdf [file 1471-2164-8-143-S3.pdf]

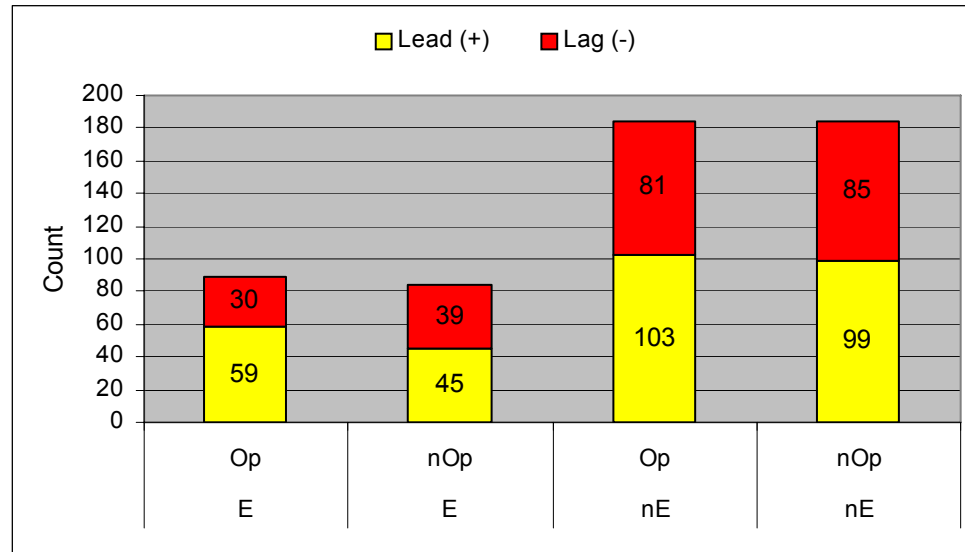

**Supplemental Figure 3 - Organization of genes in the chromosome of *Buchnera aphidicola*.** This figure shows the distribution of the genes between the leading ("+") and the lagging strand DNA ("-") for the essential genes ("E") and the non-essential ones ("nE"), predicted to be in operons ("Op"), or not ("nOp").
